# Supplementary material for: Respect of Skin Microbiome with Different Types of LeavE-on Skincare Products, an Ecobiological Approach
Source: Preprints.org preprint supplement (doi:10.20944/preprints202005.0500.v1), 2020-05-31
Supplement: Supplementary file 1 [file supplementary]

Day 1

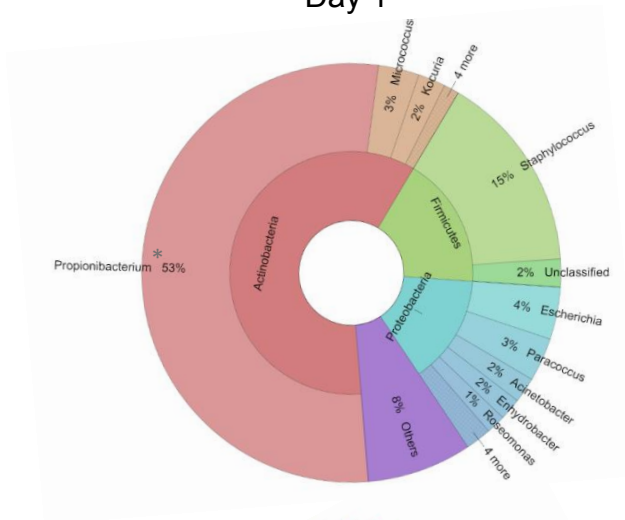

Day 4

Control

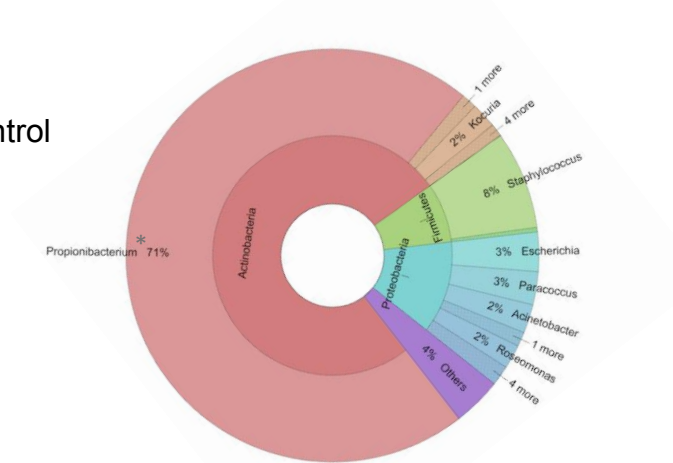

Hydrophilic solution

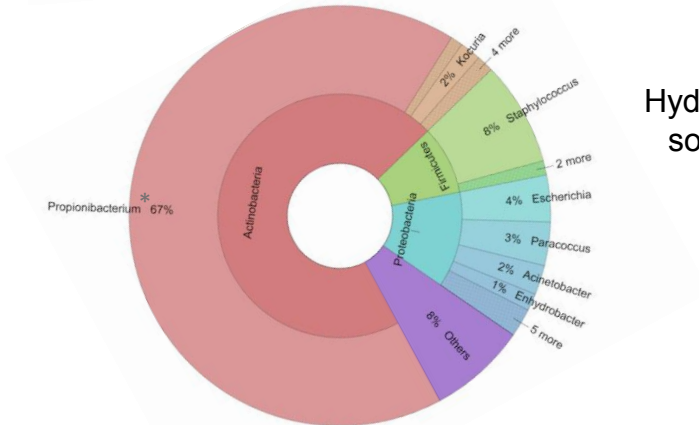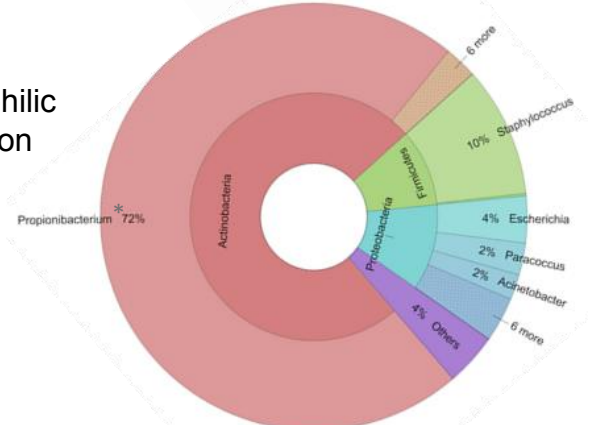

Micellar solution

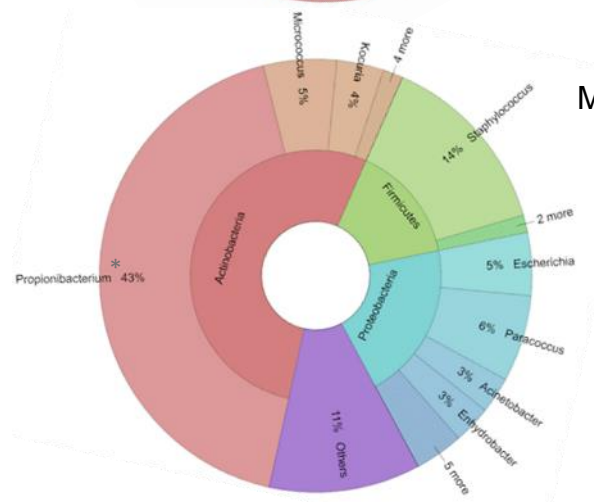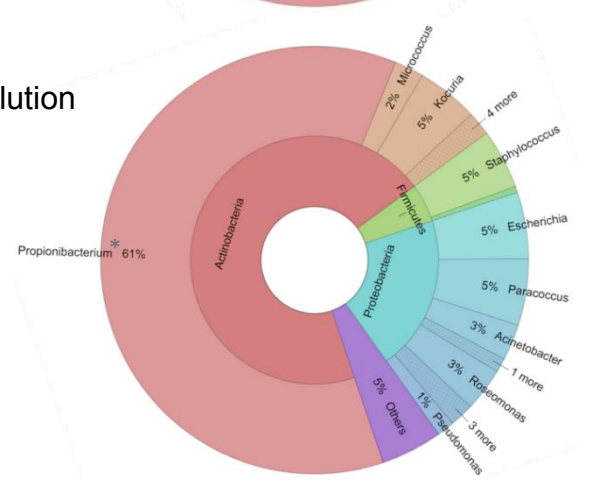

Emulsion

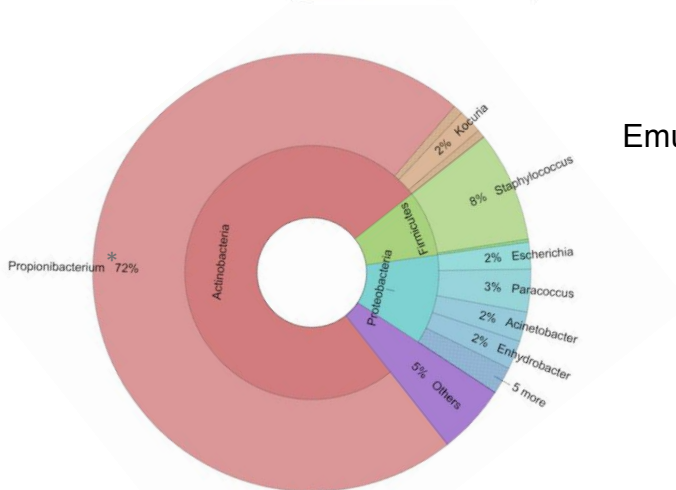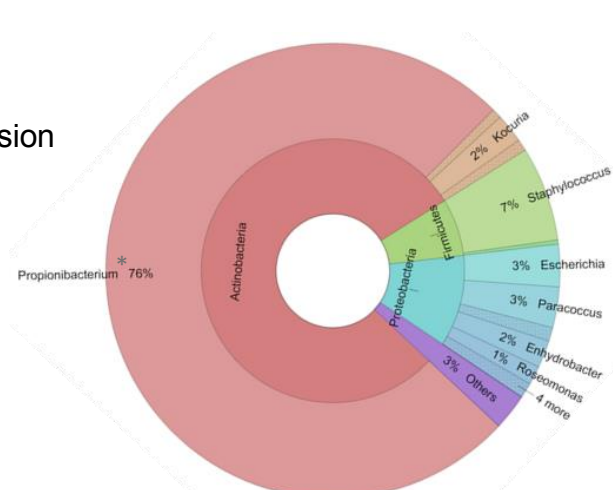

**Figure S1:** Mean of relative abundance of the most represented bacterial taxa at phylum level (internal circle) and genus level (external circle) after 24 hours (Day 1) and four days (Day 4) of application of the hydrophilic solution, the micellar solution or the emulsion compared to their control. The “Others” category contains taxa that are represented in less than 30% of the samples. \*superseded genus name for *Cutibacterium*
